# Supplementary material for: Hyperforin/HP-β-Cyclodextrin Enhances Mechanosensitive Ca2+ Signaling in HaCaT Keratinocytes and in Atopic Skin Ex Vivo Which Accelerates Wound Healing
Source: Biomed Res Int. 2017 Jan 22;2017:8701801. doi: 10.1155/2017/8701801 (PMC5292202; doi:10.1155/2017/8701801)
Supplement: Supplementary file 1 — Supplemental Movies S1. The stretch-induced Ca2+ responses and the propagation of Ca2+ waves from the wound edge. S2. The stretch-induced release of ATP from the leading cells of the wound edge (20% for 1 s, applied perpendicular to the linear gap). S3. The Ca2+ oscillations and the Ca2+ response to stretching in the epidermis of normal skin ex vivo. S4. The reduced Ca2+ response to stretching in the epidermis of atopic skin ex vivo. S5. The hyperforin/HP-β-CD treatment-enhanced Ca2+ oscillations and Ca2+ response to stretching in the epidermis of atopic skin ex vivo. [file 8701801.f1.zip]

Archive with 5 entries (5 files):
- MovieS1_The stretch-induced Ca2+ responses and the propagation of waves from the wound edge_small.mp4
- MovieS2_The stretch-induced release of ATP from the leading cells of the wound edge_small.mp4
- MovieS3_The Ca2+ oscillations and the Ca2+ response to stretching in the epidermis of normal skin ex vivo_small.mp4
- MovieS4_The reduced Ca2+ response to stretching in the epidermis of atopic skin ex vivo_small.mp4
- MovieS5_The hyperforinHP-â└-CD treatment-enhanced Ca2+ oscillations and Ca2+ response to stretching in the epidermis of atopic skin ex vivo_small.mp4
